# Supplementary material
Source: Research Square preprint supplement (doi:10.21203/rs.3.rs-8926499/v1)
Supplement: Supplementary file 1 [file fee971d91707d2fe277e82bd.docx]

**SUPPLEMENTARY INFORMATION**

**Conformational, Molecular, Spectral and Binding Properties of Zn(II)-Coordinated Glycol Nucleic Acid Monophosphates: A DFT, Docking and Molecular Dynamics Assessment**

Mwikwm Basumatary, Phulung Basumatary, Satyajit Barman, Gunajyoti Das*

*Department of Chemistry, Central Institute of Technology, Kokrajhar 783370, Assam, India.*

**CONTENTS**

1. **Table S1.** Scaled zero-point energies (ZPE)**,** total energies, enthalpies, free energies, dipole moments and polarizabilities of GNA monomers with and without metal.
2. **Table S2.** HOMO, LUMO, Egap, and global reactivity descriptors of GNA species (with and without Zn(II) coordination) computed at B3LYP/6-311++G(d,p) with CPCM solvation.
3. **Fig. S1.** HOMO-LUMO (Egap) energy gaps of: GNACR, GNACR–Zn, GNACS, GNACS–Zn, GNATR, GNATR–Zn, GNAUR, GNAUR–Zn, GNAUS, and GNAUS–Zn
4. **Fig. S2.** IR spectra (not scaled) obtained for GNACR and GNACR–Zn, GNACS, and GNACS–Zn at B3LYP/6-311++G(d,p) level of theory with CPCM solvation.
5. **Fig. S3.** IR spectra (not scaled) obtained for GNATR and GNATR–Zn, GNATS, and GNATS–Zn at B3LYP/6-311++G(d,p) level of theory with CPCM solvation.
6. **Fig. S4.** IR spectra (not scaled) obtained for GNAUR and GNAUR–Zn, GNAUS, and GNAUS–Zn at B3LYP/6-311++G(d,p) level of theory with CPCM solvation.
7. **Fig. S5.** Superimposed docked poses of LF1 (magenta), LG1 (yellow) and LH1 (cyan) including the positions of amino acid residues; ASP30 (green), GLU31 (wheat) and GLY13 (warm pink) in apo-KRAS.
8. **Table S3.** Estimated binding scores (kcal/mol) of metal bound GNA conformers against apo-KRAS obtained after docking.
9. **Table S4.** Calculated single frame binding free energies* (ΔGBinding) in kcal/mol of the docked complexes.
10. **Table S5.** GAFF atom types and AM1-BCC partial charges assigned to GNATR ligand in absence of metal.
11. **Fig. S6.** Atom identities of LG1: **A** without metal; **B** with metal, used for the GAFF atom assignment and MCPB force field parameterization.
12. **Table S6a.** CalculatedMean RMSD, Standard Deviation (SD) and Standard Error of the Mean (SEM) of Cα atoms after lsq fit on Cα for the replicas.
13. **Table S6b.** Mean RMSD, Standard Deviation (SD) and Standard Error of the Mean (SEM) of LG1 after lsq fit on Protein for the replicas.
14. **Table S7a.** Mean RMSF, Standard Deviation (SD) and Standard Error of the Mean (SEM) of Cα atoms after lsq fit on Cα for the replicas.
15. **Table S7b.** Mean RMSF, Standard Deviation (SD) and Standard Error of the Mean (SEM) of LG1 after lsq fit on Protein for the replicas.
16. **Table S8**. Mean Radius of Gyration (Rg), Standard Deviation (SD) and Standard Error of the Mean (SEM) across the replicas.
17. **Table S9a.** Force Field parameters obtained for LF1 in the KR–LF1 complex using DFT (B3LYP/6-31G(d)/SDD).
18. **Table S9b.** Force Field parameters obtained for LF2 in the KR–LF2 complex using DFT (B3LYP/6-31G(d)/SDD).
19. **Table S9c.** Force Field parameters obtained for LG1 in the KR–LG1 complex using DFT (B3LYP/6-31G(d)/SDD).
20. **Table S9d.** Force Field parameters obtained for LG2 in the KR–LG2 complex using DFT (B3LYP/6-31G(d)/SDD).
21. **Table S9e.** Force Field parameters obtained for LH1 in the KR–LH1 complex using DFT (B3LYP/6-31G(d)/SDD).
22. **Table S9f.** Force Field parameters obtained for LH2 in the KR–LH2 complex using DFT (B3LYP/6-31G(d)/SDD).

**Table S1.** Scaled Zero-Point Energies (ZPE)a, Total Energies (E), Enthalpies (H), Free Energies (G), dipole moments (μ), and polarizabilities (α) of glycol nucleic acid (GNA) monomers with and without Zn (II).

| **Systems** | **ZPE (scaled)** | **Total Energy (E)** | **Enthalpy (H)** | **Gibbs Energy (G)** | **Dipole Moment (µ)** | **Polarizability (α)** |
| --- | --- | --- | --- | --- | --- | --- |
| GNACR | 0.213590 | –1231.152881 | –1230.917314 | –1230.985291 | 7.45 | 196.48 |
| GNACS | 0.213455 | –1231.150369 | –1230.914943 | –1230.98259 | 10.22 | 196.66 |
| GNACR–Zn | 0.216580 | –3010.222098 | –3009.982180 | –3010.053900 | 26.88 | 198.85 |
| GNACS–Zn | 0.216296 | –3010.220845 | –3009.981075 | –3010.05328 | 24.37 | 198.96 |
| GNATR | 0.229798 | –1290.351231 | –1290.098321 | –1290.167871 | 7.99 | 202.94 |
| GNATS | 0.229744 | –1290.34984 | –1290.096978 | –1290.166779 | 11.04 | 203.12 |
| GNATR–Zn | 0.232127 | –3069.401514 | –3069.144841 | –3069.218443 | 36.43 | 209.37 |
| GNATS–Zn | 0.232673 | –3069.400746 | –3069.143482 | –3069.216320 | 32.75 | 209.76 |
| GNAUR | 0.202462 | –1251.050484 | –1250.826858 | –1250.893473 | 6.71 | 185.16 |
| GNAUS | 0.202304 | –1251.048871 | –1250.825371 | –1250.892455 | 8.36 | 185.24 |
| GNAUR–Zn | 0.204285 | –3030.101936 | –3029.874844 | –3029.945520 | 37.71 | 191.73 |
| GNAUS–Zn | 0.204577 | –3030.099334 | –3029.872011 | –3029.942432 | 35.23 | 191.64 |

a *ZPE correction has been applied on all the energies using the scaling factor of 0.9877, the corresponding energy values are reported in Hartree, dipole moment in Debye and polarizability in a.u.***Table S2.** HOMO, LUMO, Egap (eV), chemical potential (μ), Chemical hardness (η) and Electrophilicity index (ω) of the GNA species computed using B3LYP/6-311++G(d,p) level with CPCM solvation.

| **System** | **HOMO (EHOMO)** | **LUMO (ELUMO)** | **Egap (ELUMO – EHOMO)** | **Chemical potential (μ)** | **Chemical hardness (η)** | **Electrophilicity index (ω)** |
| --- | --- | --- | --- | --- | --- | --- |
| GNACR | –6.71 | –1.30 | 5.41 | –4.00 | 2.70 | 2.96 |
| GNACS | –6.71 | –1.37 | 5.34 | –4.04 | 2.67 | 3.06 |
| GNATR | –6.75 | –1.47 | 5.28 | –4.11 | 2.64 | 3.20 |
| GNATS | –6.76 | –1.50 | 5.26 | –4.13 | 2.63 | 3.24 |
| GNAUR | –7.04 | –1.56 | 5.48 | –4.30 | 2.74 | 3.37 |
| GNAUS | –7.06 | –1.62 | 5.44 | –4.34 | 2.72 | 3.46 |

*GNA conformers without Zn (II) coordination*

| **System** | **HOMO (EHOMO)** | **LUMO (ELUMO)** | **Egap (ELUMO – EHOMO)** | **Chemical potential (μ)** | **Chemical hardness (η)** | **Electrophilicity index (ω)** |
| --- | --- | --- | --- | --- | --- | --- |
| GNACR–Zn | –7.70 | –2.75 | 4.95 | –5.22 | 2.47 | 5.52 |
| GNACS–Zn | –7.69 | –2.74 | 4.95 | –5.21 | 2.47 | 5.49 |
| GNATR–Zn | –7.37 | –3.16 | 4.21 | –5.26 | 2.10 | 6.59 |
| GNATS–Zn | –7.34 | –3.18 | 4.16 | –5.26 | 2.08 | 6.65 |
| GNAUR–Zn | –7.65 | –3.17 | 4.48 | –5.41 | 2.24 | 6.53 |
| GNAUS–Zn | –7.65 | –3.20 | 4.45 | –5.42 | 2.22 | 6.62 |

*GNA conformers with Zn (II) coordinated*


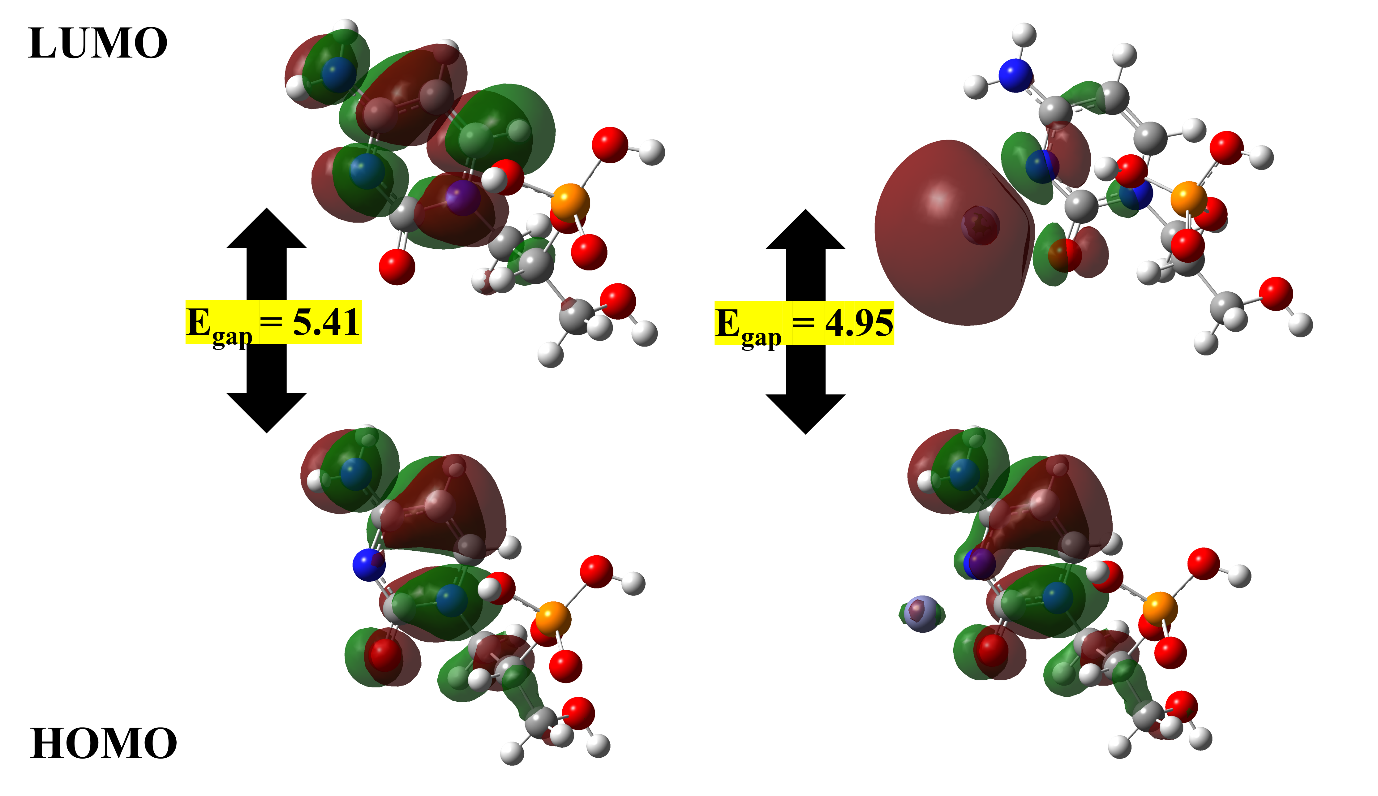


**Fig. S1.** HOMO–LUMO energy gaps (Egap in eV) of GNACR (on left; Egap = 5.41 eV) and GNACR–Zn (on right; Egap = 4.95 eV).


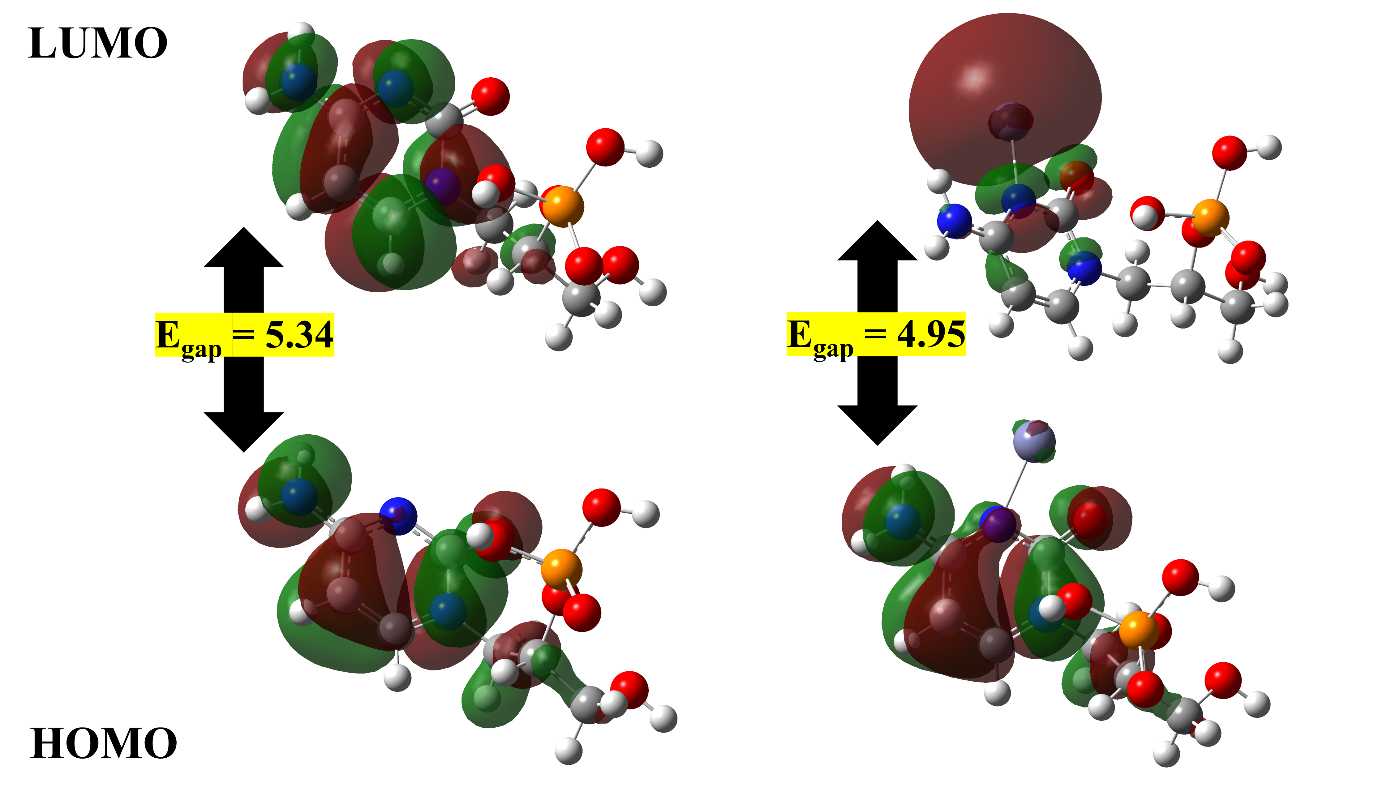


**Fig. S1 (Continued).** HOMO–LUMO energy gaps (Egap in eV) of GNACS (on left; Egap = 5.34 eV) and GNACS–Zn (on right; Egap = 4.95 eV).


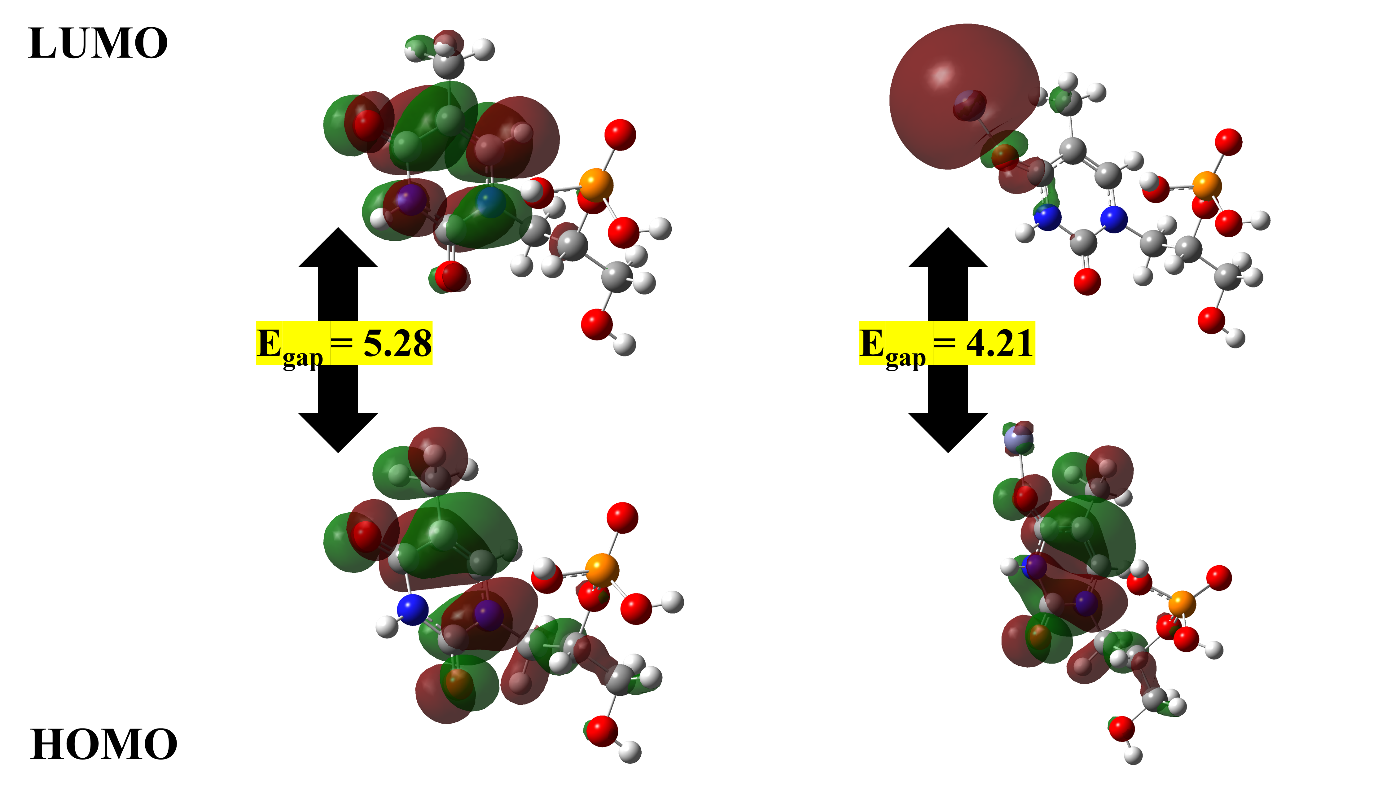


**Fig. S1 (Continued).** HOMO–LUMO energy gaps (Egap in eV) of GNATR (on left; Egap = 5.28 eV) and GNATR–Zn (on right; Egap = 4.21 eV).

**
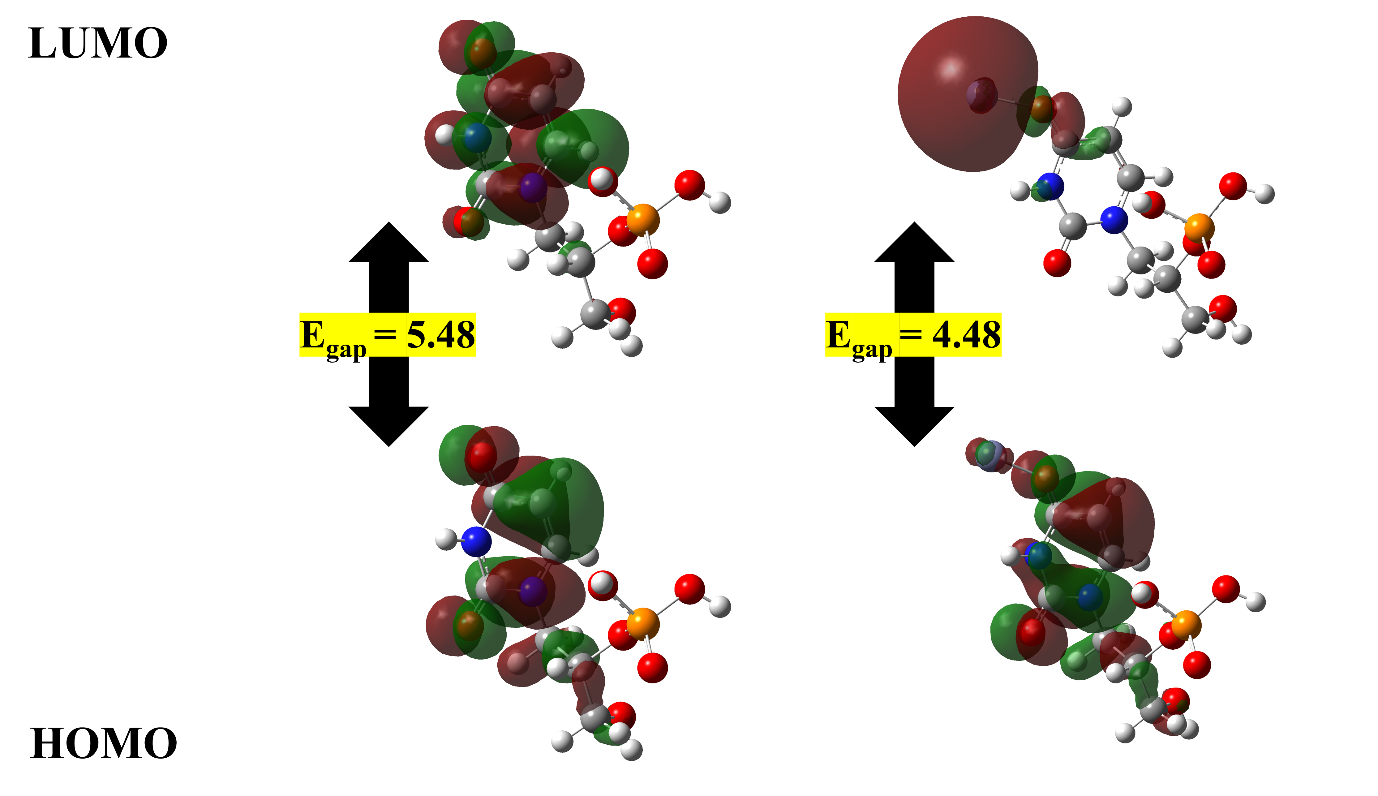
**

**Fig. S1 (Continued).** HOMO–LUMO energy gaps (Egap in eV) of GNAUR (on left; Egap = 5.48 eV) and GNAUR–Zn (on right; Egap = 4.48 eV).

**
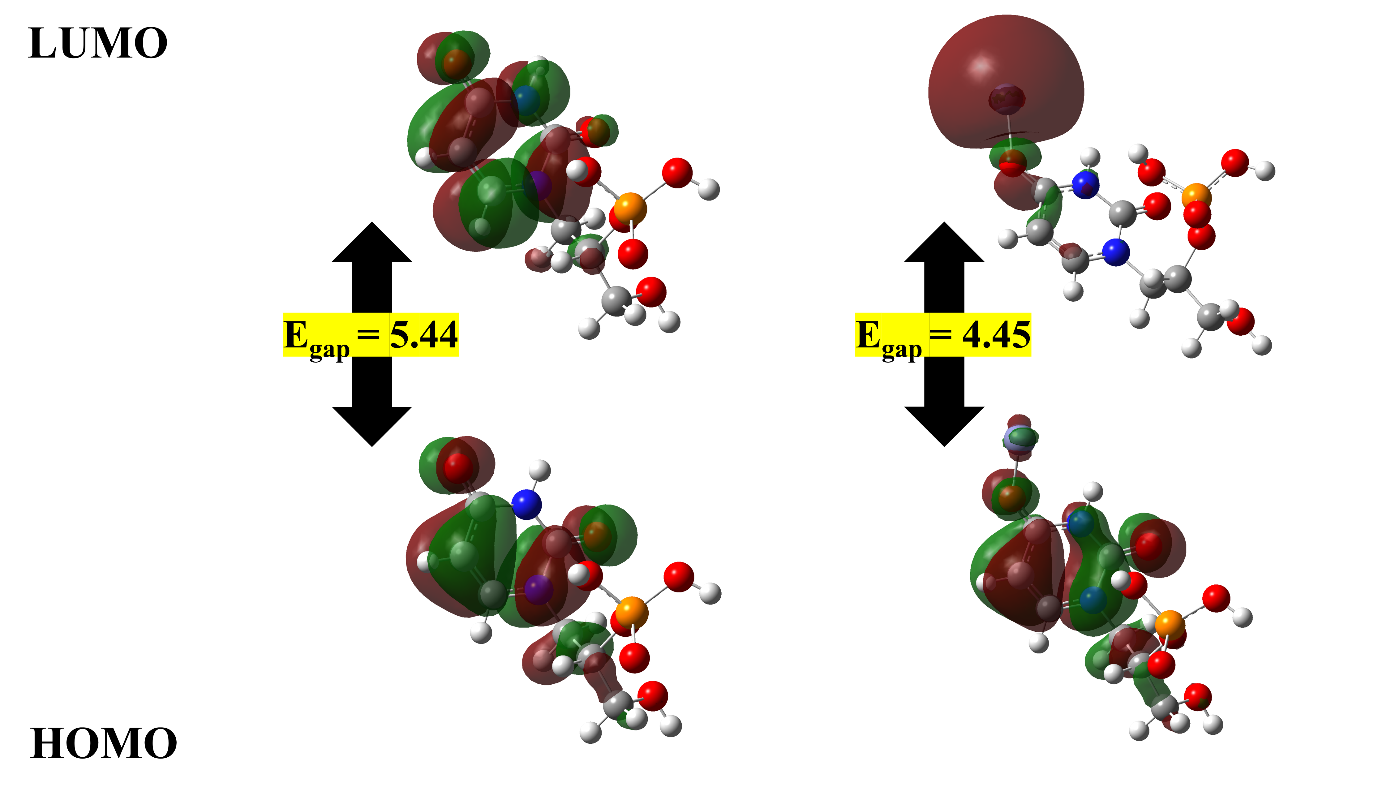
**

**Fig. S1 (Continued).** HOMO–LUMO energy gaps (Egap in eV) of GNAUS (on left; Egap = 5.44 eV) and GNAUS–Zn (on right; Egap = 4.45 eV).


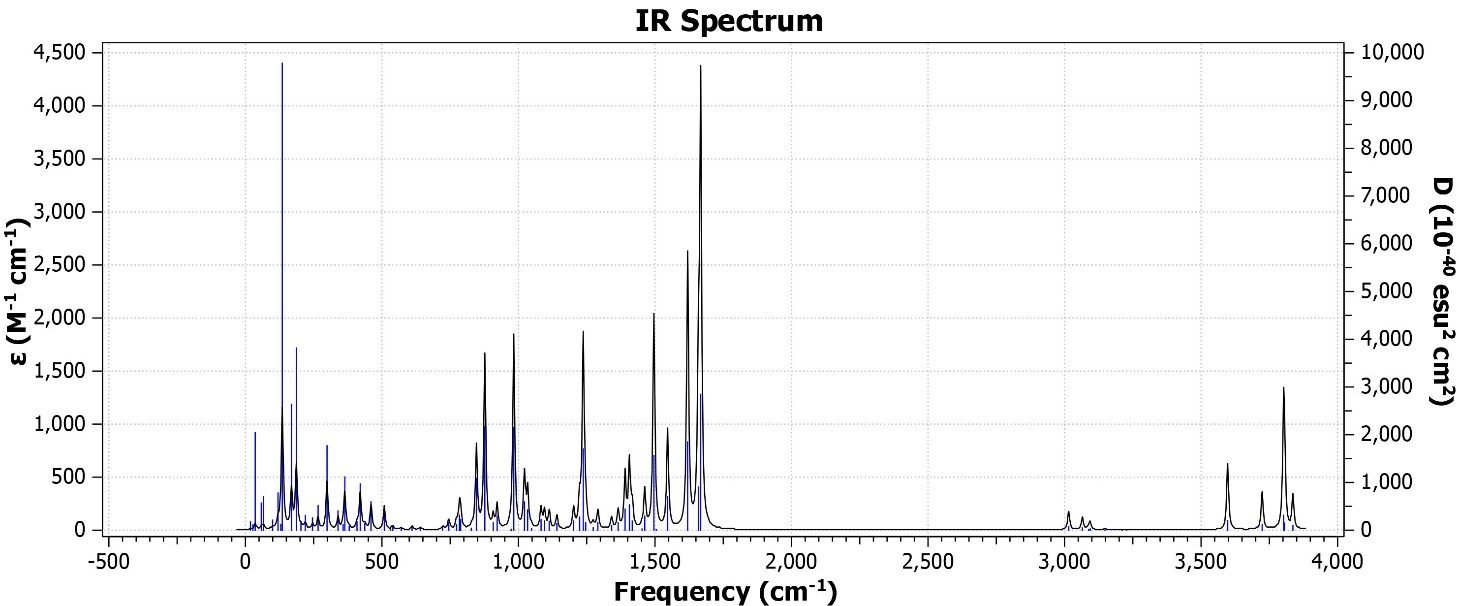


*IR spectra for GNACR*


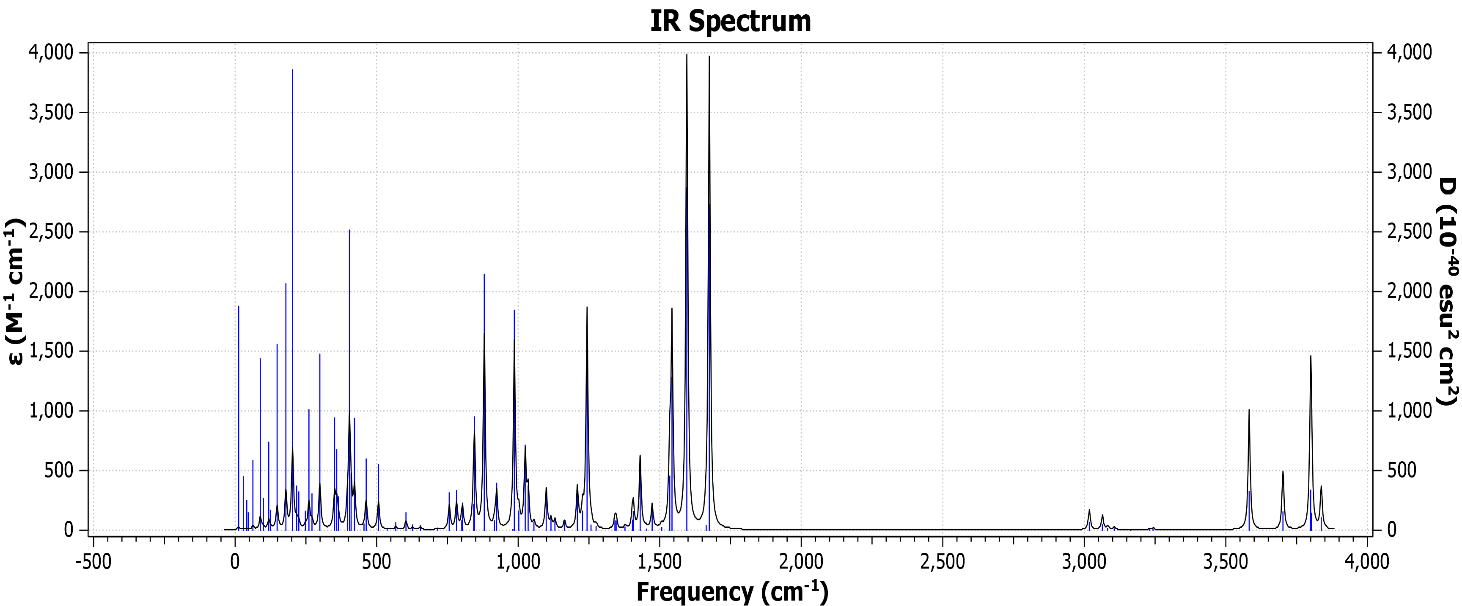


*IR spectra for GNACR–Zn*

**Fig. S2.** IR spectra (not scaled) obtained for GNACR and GNACR–Zn at B3LYP/6-311++G(d,p) level of theory with CPCM solvation.


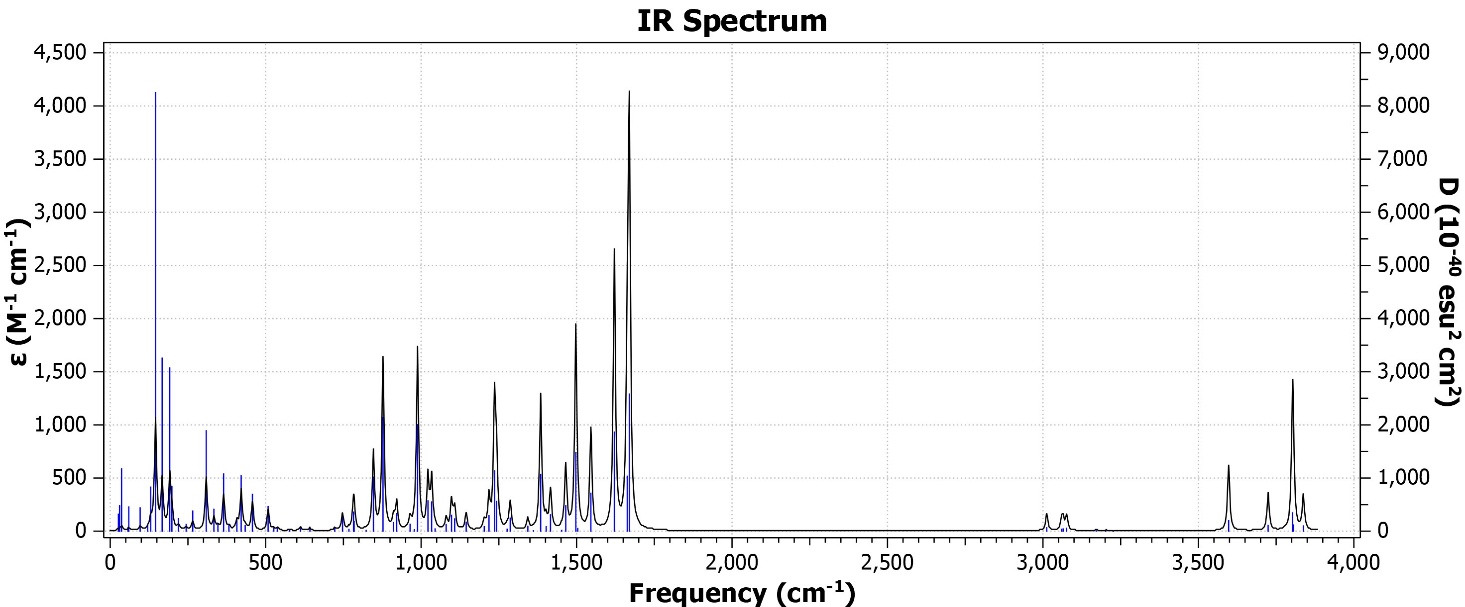


*IR spectra for GNACS*


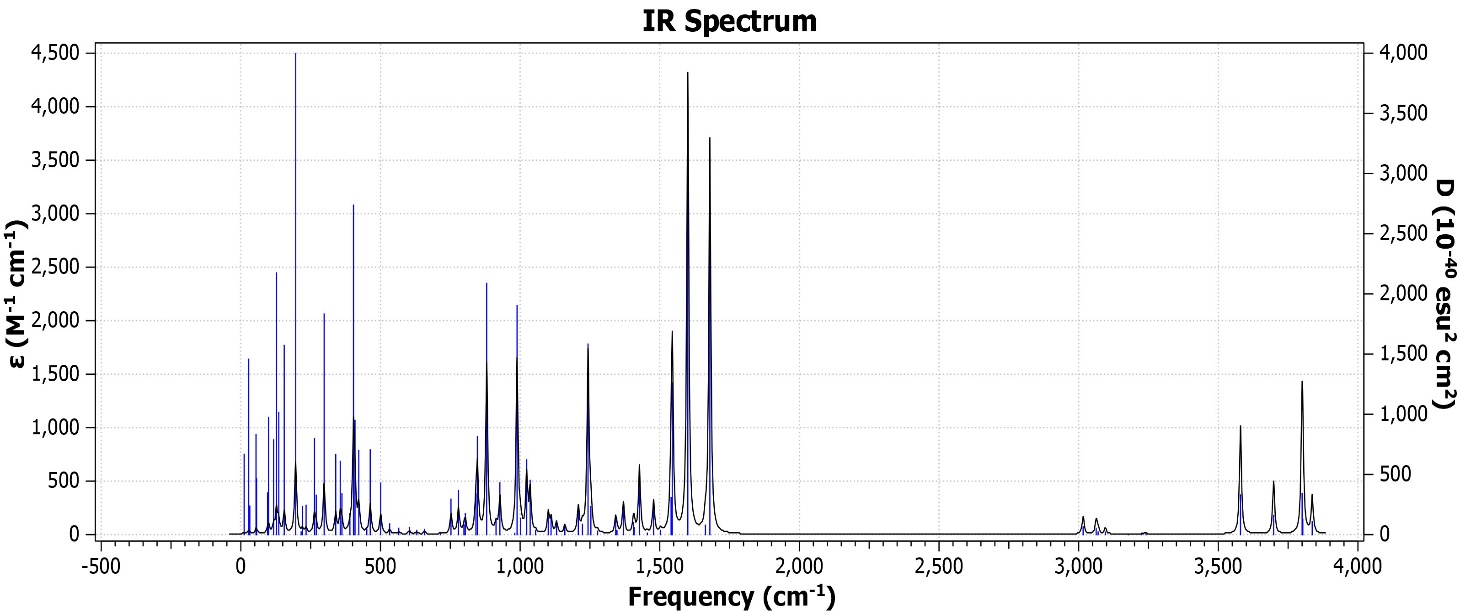


*IR spectra for GNACS–Zn*

**Fig. S2.** Continued


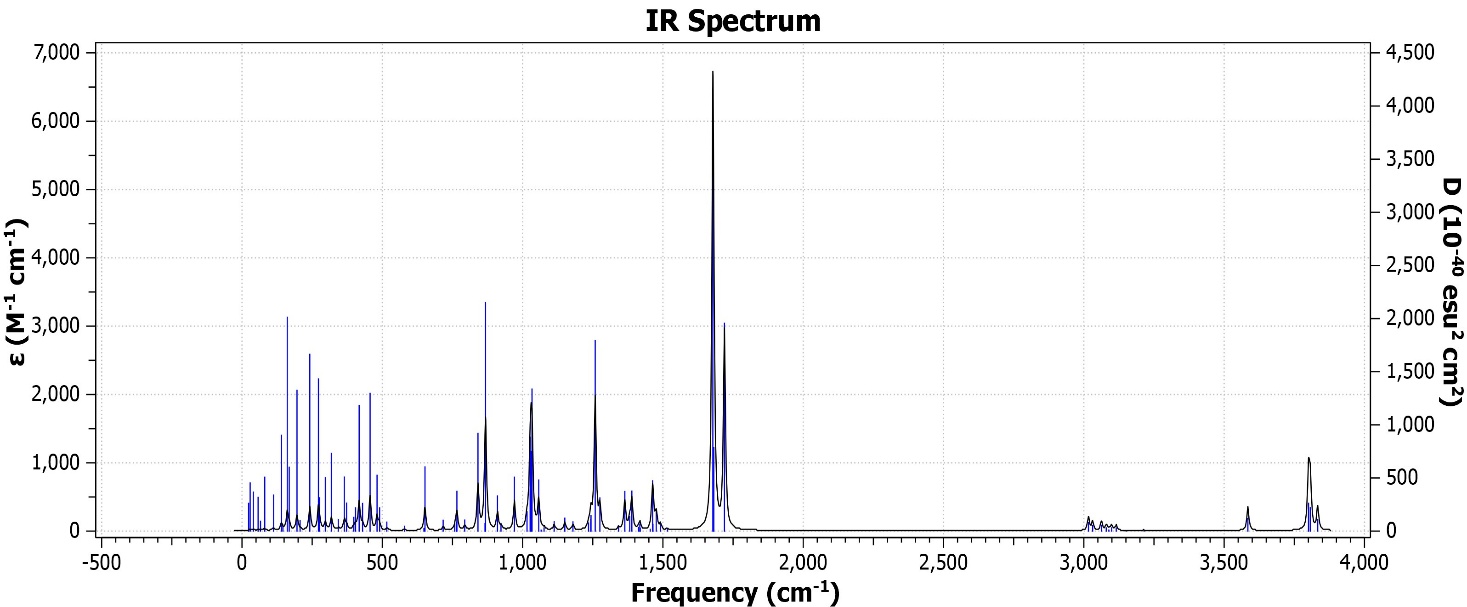


*IR spectra for GNATR*


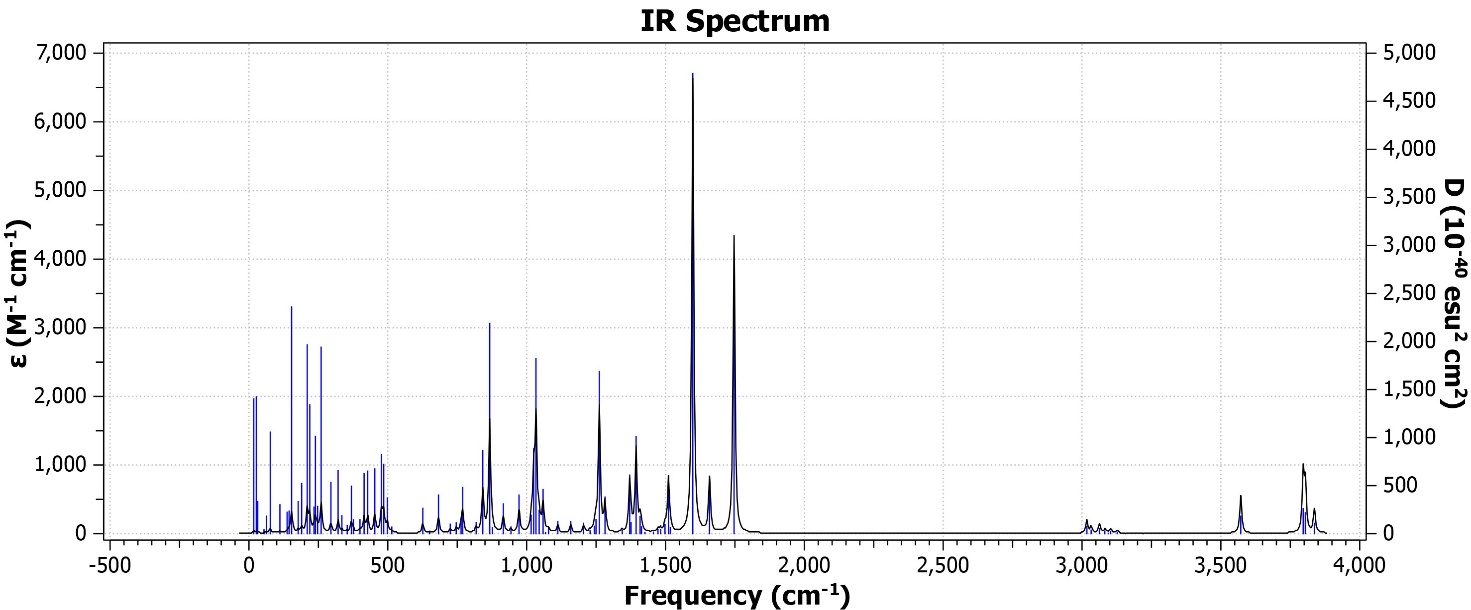


*IR spectra for GNATR–Zn*

**Fig. S3.** IR spectra obtained (not scaled) for GNATR and GNATR–Zn at B3LYP/6-311++G(d,p) level of theory with CPCM solvation.


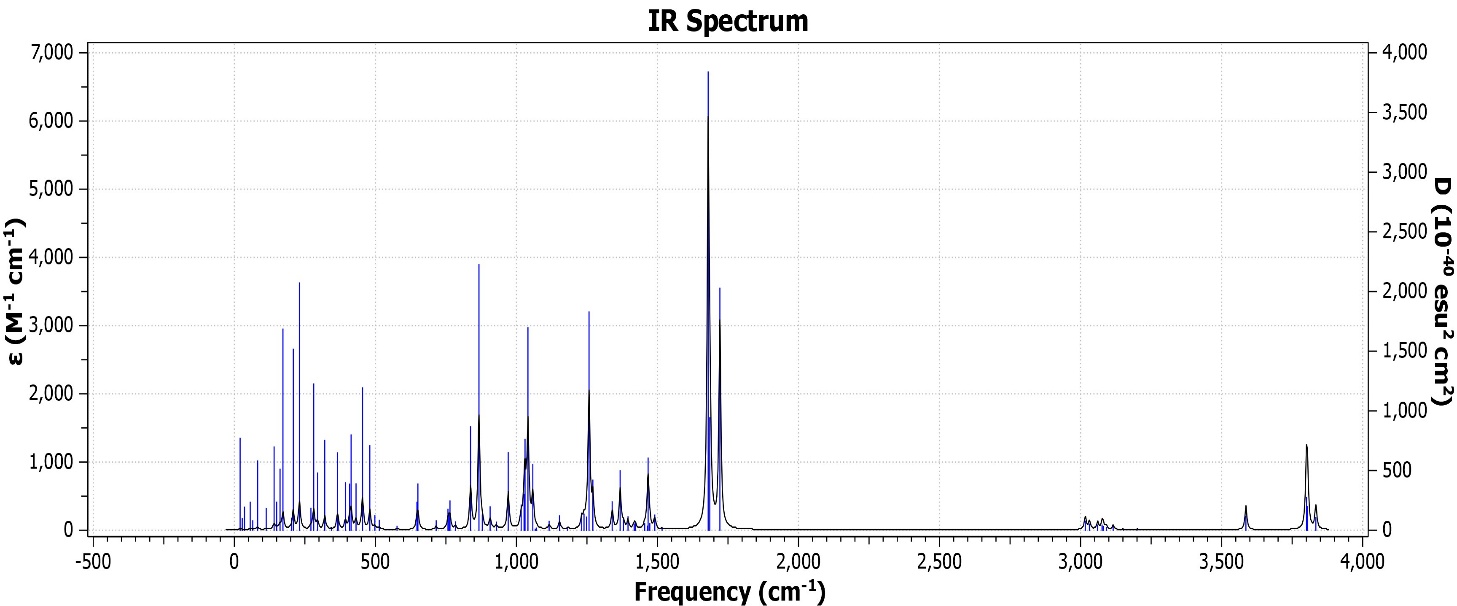


*IR spectra for GNATS*


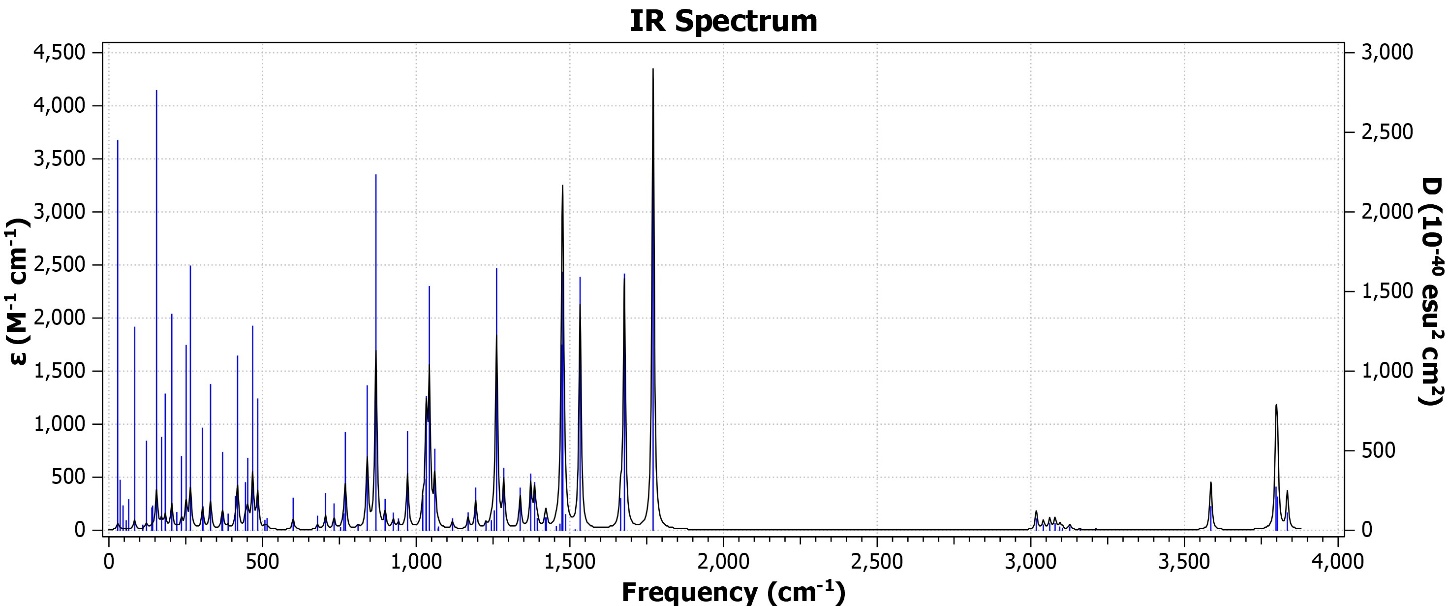


*IR spectra for GNATS–Zn*

**Fig. S3.** Continued.


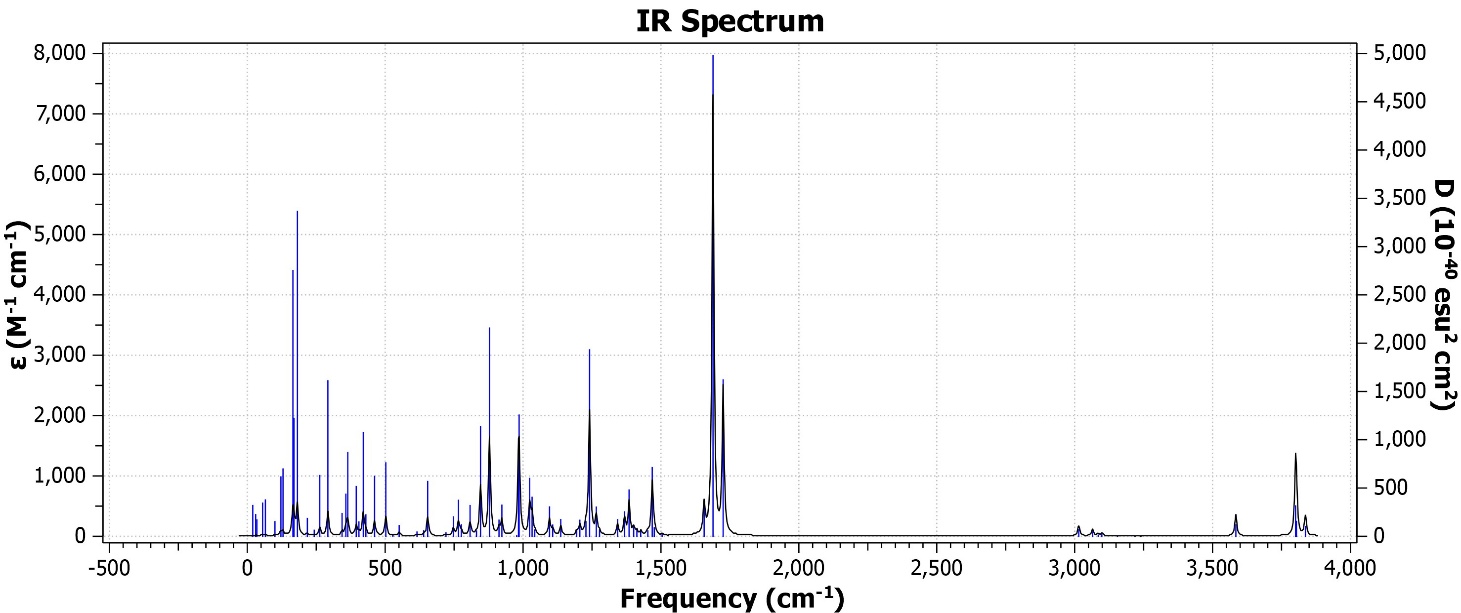


*IR spectra for GNAUR*


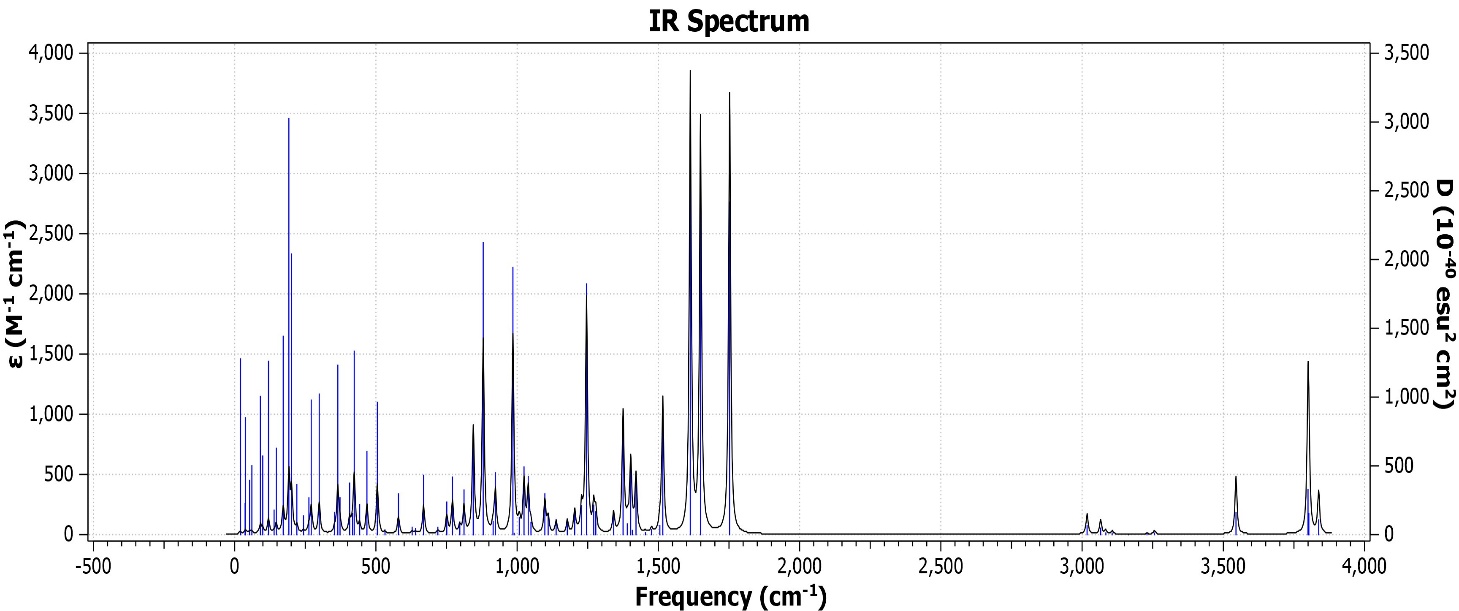


*IR spectra for GNAUR–Zn*

**Fig. S4.** IR spectra obtained (not scaled) for GNAUR and GNAUR–Zn at B3LYP/6-311++G(d,p) level of theory with CPCM solvation.


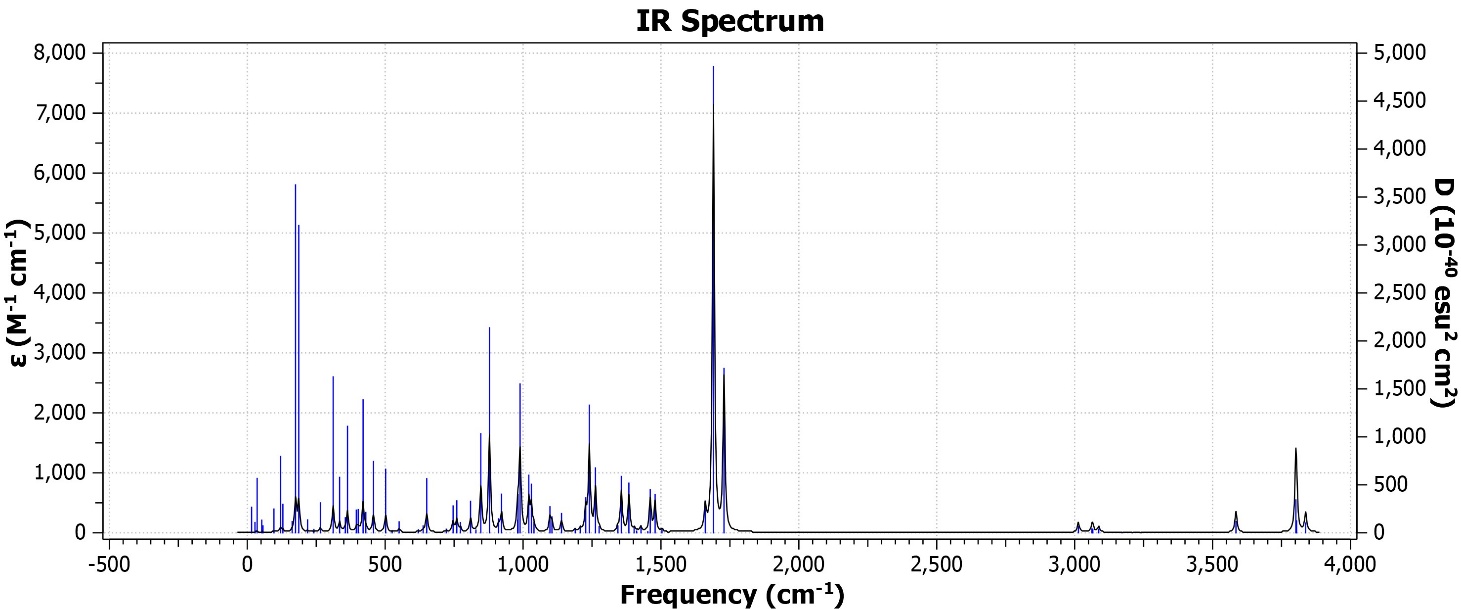


*IR spectra for GNAUS*


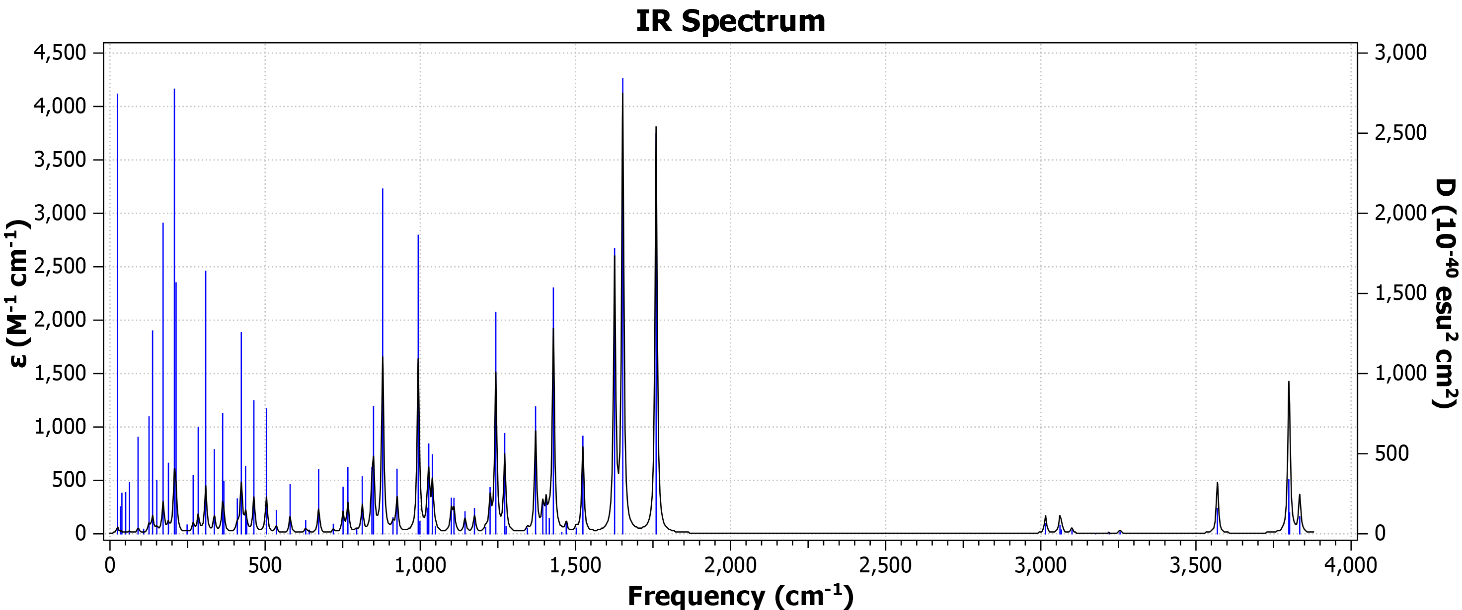


*IR spectra for GNAUR–Zn*

**Fig. S4.** Continued.


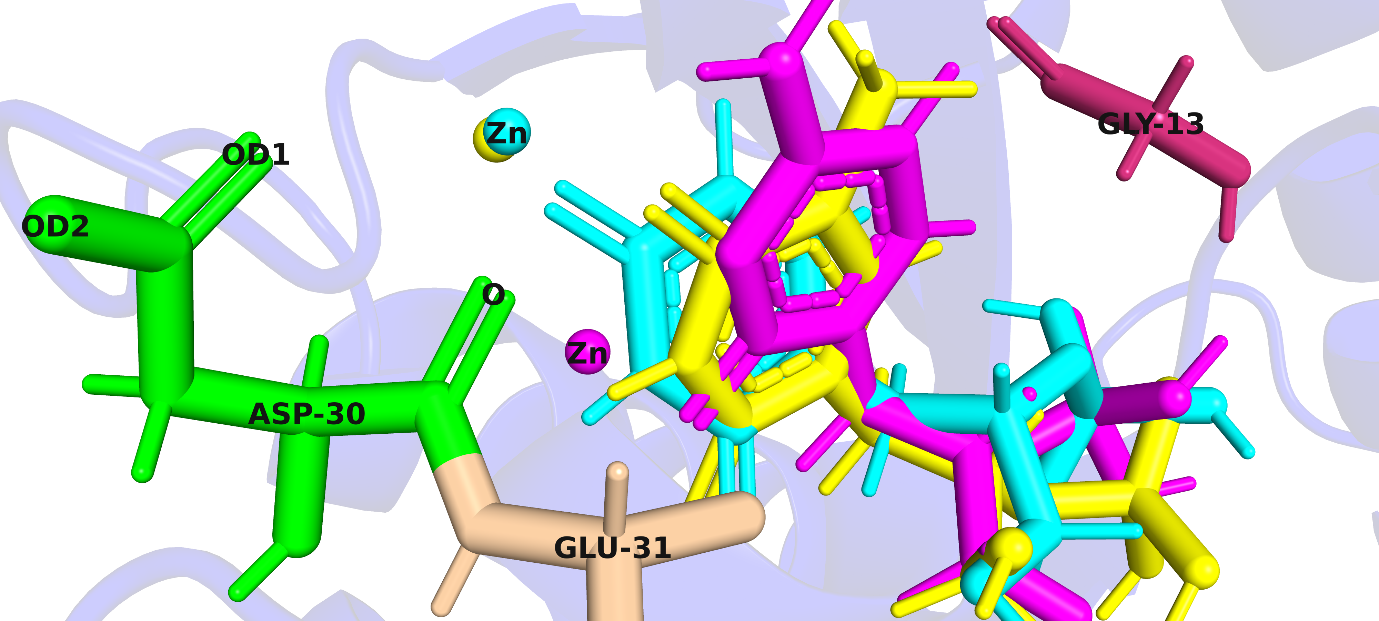


**Fig. S5.** Superimposed docked poses of LF1 (magenta), LG1 (yellow) and LH1 (cyan) including the positions of amino acid residues; ASP30 (green), GLU31 (wheat) and GLY13 (warm pink) in apo-KRAS.

**Table S3.** Estimated binding scores (kcal/mol) of a metal bound GNA conformers against apo-KRAS obtained after docking.

| **GNA Conformers** | **Binding Scores (Ebinding) in kcal/mol** |
| --- | --- |
| KR–LF1 | –7.2 |
| KR–LF2 | –7.1 |
| KR–LG1 | –7.2 |
| KR–LG2 | –7.2 |
| KR–LH1 | –7.4 |
| KR–LH2 | –7.6 |

| **GNA Conformers** | **vdW** | **EEL** | **EPB** | **ΔGGas** | **ΔGSolv** | **ΔGBinding** |
| --- | --- | --- | --- | --- | --- | --- |
| KR–LF1 | –29.43 | –81.88 | 88.20 | –111.31 | 104.53 | –6.78 |
| KR–LF2 | –28.83 | –77.87 | 85.85 | –106.70 | 103.16 | –3.54 |
| KR–LG1 | –37.59 | –64.47 | 74.63 | –102.06 | 92.16 | –9.90 |
| KR–LG2 | –29.94 | –83.49 | 89.35 | –113.34 | 105.91 | –7.43 |
| KR–LH1 | –31.72 | –80.13 | 87.37 | –111.85 | 103.94 | –7.91 |
| KR–LH2 | –31.42 | –80.58 | 87.87 | –112.00 | 105.00 | –7.01 |

**Table S4.** Calculated single frame binding free energies* (ΔGBinding) in kcal/mol of the docked complexes.

**Internal dielectric constant; ε = 4 was applied for the calculation of PB based binding free energies of all the GNA conformers with ionic strength of 0.15 M.*

**Table S5.** GAFF atom types and AM1-BCC partial charges assigned to GNATR ligand in absence of metal.

| **Atom** | **Type** | **Charge** |
| --- | --- | --- |
| N1 | n | –0.378000 |
| N3 | n | –0.581500 |
| C1ʹ | c3 | 0.082000 |
| C2 | c | 0.808500 |
| C4 | c | 0.714700 |
| C5 | cc | –0.243400 |
| C6 | cd | 0.033600 |
| C9 | c3 | –0.033900 |
| C2ʹ | c3 | 0.125100 |
| C3ʹ | c3 | 0.126400 |
| O7 | o | –0.661500 |
| O8 | o | –0.598500 |
| O4ʹ | oh | –0.587800 |
| O5ʹ | os | –0.575200 |
| O7ʹ | o | –0.812300 |
| O8ʹ | oh | –0.754900 |
| O9ʹ | oh | –0.754900 |
| P6ʹ | p5 | 1.637500 |
| H1ʹa | h1 | 0.085200 |
| H1ʹb | h1 | 0.085200 |
| H3 | hn | 0.356500 |
| H6 | h4 | 0.174000 |
| H9a | hc | 0.055033 |
| H9b | hc | 0.055033 |
| H9c | hc | 0.055033 |
| H2ʹ | h1 | 0.073700 |
| H3ʹa | h1 | 0.055200 |
| H3ʹb | h1 | 0.055200 |
| H4ʹ | ho | 0.424000 |
| H8ʹ | ho | 0.491000 |
| H9ʹ | ho | 0.491000 |

**
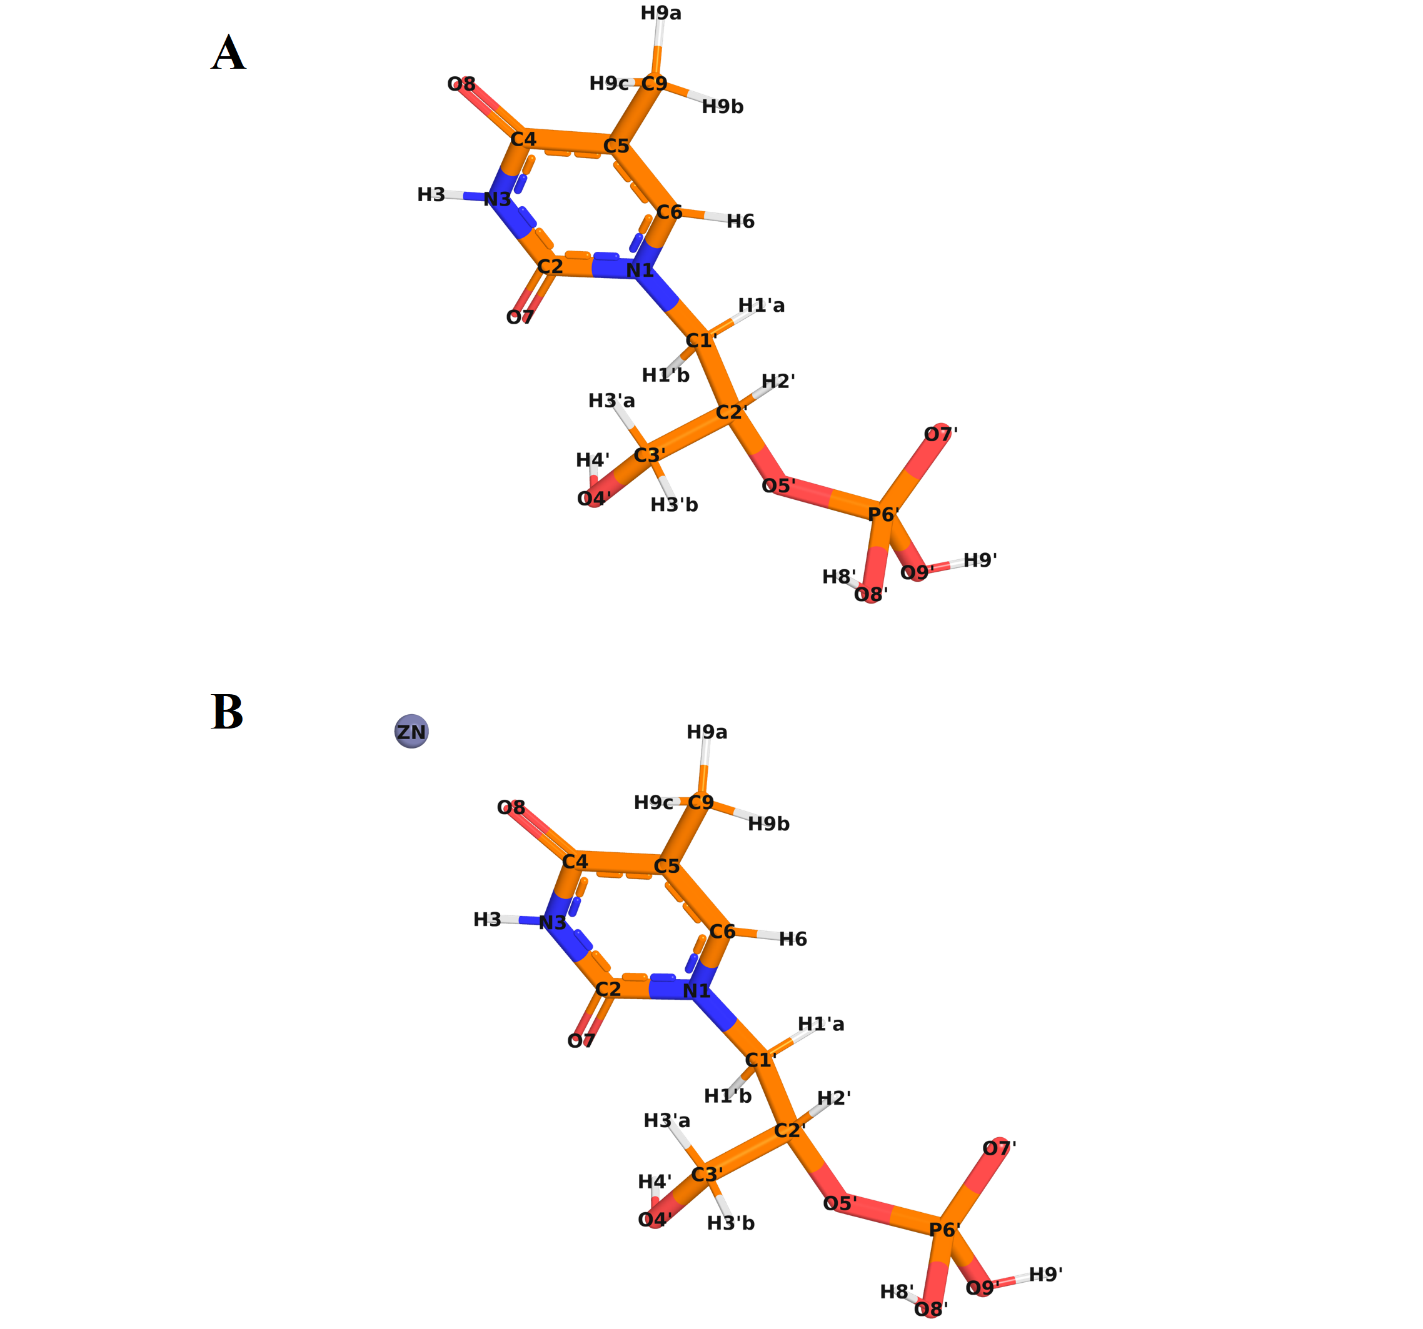
**

**Fig. S6.** Atom identities of LG1: **A**; without metal **B**; with metal, used for the GAFF atom assignment and MCPB force field parameterization.

**Table S6a.** Mean RMSD, Standard Deviation (SD) and Standard Error of the Mean (SEM) of Cα atoms after lsq fit on Cα for the replicas.

| Replicas | Mean RMSD | SD | SEM |
| --- | --- | --- | --- |
| Rep A | 0.1361933 | 0.0179091 | 0.0005661 |
| Rep B | 0.155158 | 0.0497492 | 0.0015724 |
| Rep C | 0.131169 | 0.0157419 | 0.0004976 |

Calculations are derived from the equations shown below.

**Table S6b.** Mean RMSD, Standard Deviation (SD) and Standard Error of the Mean (SEM) of LG1 after lsq fit on Protein for the replicas.

| Replicas | Mean RMSD | SD | SEM |
| --- | --- | --- | --- |
| Rep A | 0.835725 | 0.58602 | 0.018522 |
| Rep B | 0.413058 | 0.132937 | 0.004202 |
| Rep C | 0.184253 | 0.052584 | 0.001662 |

**Table S7a.** Mean RMSF, Standard Deviation (SD) and Standard Error of the Mean (SEM) of Cα atoms after lsq fit on Cα for the replicas.

| Replicas | Mean RMSF | SD | SEM |
| --- | --- | --- | --- |
| Rep A | 0.071466 | 0.042977 | 0.003277 |
| Rep B | 0.082645 | 0.069911 | 0.005331 |
| Rep C | 0.069967 | 0.039334 | 0.002999 |

**Table S7b.** Mean RMSF, Standard Deviation (SD) and Standard Error of the Mean (SEM) of LG1 after lsq fit on Protein for the replicas.

| Replicas | Mean RMSF | SD | SEM |
| --- | --- | --- | --- |
| Rep A | 0.124531 | 0.044600 | 0.007884 |
| Rep B | 0.082341 | 0.032288 | 0.005708 |
| Rep C | 0.039938 | 0.024080 | 0.004257 |

**Table S8**. Mean Radius of Gyration (Rg), Standard Deviation (SD) and Standard Error of the Mean (SEM) across the replicas.

| Replicas | Mean Rg | SD | SEM |
| --- | --- | --- | --- |
| Rep A | 1.568515 | 0.010742 | 0.00034 |
| Rep B | 1.570916 | 0.00906 | 0.000286 |
| Rep C | 1.557741 | 0.006757 | 0.000214 |

| **Type** | **Interaction** | **Parameters** | **Notes** |
| --- | --- | --- | --- |
| MASS | M1 | Mass = 65.4 | Zn ion |
| MASS | Y1 | Mass = 14.01; Charge = 0.530 | Sp2 N in non–pure aromatic systems |
| MASS | Y2 | Mass = 16.00; Charge = 0.434 | O with one connected atom |
| BOND | Y1–M1 | k = 61.4 kcal·mol–1 ·Å2; r0 = 2.03 Å | Seminario |
| BOND | Y2–M1 | k = 89.4 kcal·mol–1 ·Å2; r0 = 1.95 Å | Seminario |
| BOND | Y1–c | k = 416.9 kcal·mol–1 ·Å2; r0 = 1.39 Å | CORR_SOURCE5 |
| BOND | Y1–cd | k = 525.4 kcal·mol–1 ·Å2; r0 = 1.32 Å | SOURCE3_SOURCE5 |
| BOND | c–Y2 | k = 637.7 kcal·mol–1 ·Å2; r0 = 1.22 Å | SOURCE1_SOURCE5 |
| ANGL | M1–Y1–c | k = 106.95; θ0 = 85.41° | Seminario |
| ANGL | M1–Y1–cd | k = 108.67; θ0 = 152.97° | Seminario |
| ANGL | Y1–M1–Y2 | k = 66.70; θ0 = 68.68° | Seminario |
| ANGL | c –Y2–M1 | k = 59.95; θ0 = 90.80° | Seminario |
| ANGL | Y1–c –Y2 | k = 73.9; θ0 = 123.18° | CORR_SOURCE5 |
| ANGL | Y1–cd–cd | k = 71.6; θ0 = 112.56° | SOURCE3 |
| ANGL | Y1–cd–nh | k = 72.4; θ0 = 120.65° | SOURCE3_SOURCE5 |
| ANGL | cd–Y1–c | k = 66.7; θ0 = 120.49° | CORR_SOURCE5 |
| ANGL | n –c –Y1 | k = 71.6; θ0 = 117.11° | CORR_SOURCE5 |
| ANGL | n –c –Y2 | k = 74.2; θ0 = 123.05° | SOURCE3_SOURCE5 |
| DIHE | X –c –Y1–X | IDIVF = 2; k = 8.0; γ = 180°; n = 2.0 | same as X–C–NC–X |
| DIHE | X –cd–Y1–X | IDIVF = 2; k = 9.5; γ = 180°; n = 2.0 | statistiv value from parm94 |
| DIHE | M1–Y1–c –Y2 | IDIVF = 3; k = 0.0; γ = 0°; n = 3.0 | Treat as zero by MCPB.py |
| DIHE | M1–Y1–cd–cd | IDIVF = 3; k = 0.0; γ = 0°; n = 3.0 | Treat as zero by MCPB.py |
| DIHE | M1–Y1–cd–nh | IDIVF = 3; k = 0.0; γ = 0°; n = 3.0 | Treat as zero by MCPB.py |
| DIHE | Y1–M1–Y2–c | IDIVF = 3; k = 0.0; γ = 0°; n = 3.0 | Treat as zero by MCPB.py |
| DIHE | Y1–c –Y2–M1 | IDIVF = 3; k = 0.0; γ = 0°; n = 3.0 | Treat as zero by MCPB.py |
| DIHE | Y2–M1–Y1–c | IDIVF = 3; k = 0.0; γ = 0°; n = 3.0 | Treat as zero by MCPB.py |
| DIHE | Y2–M1–Y1–cd | IDIVF = 3; k = 0.0; γ = 0°; n = 3.0 | Treat as zero by MCPB.py |
| DIHE | cd–Y1–c –Y2 | IDIVF = 3; k = 0.0; γ = 0°; n = 3.0 | Treat as zero by MCPB.py |
| DIHE | n –c –Y1–M1 | IDIVF = 3; k = 0.0; γ = 0°; n = 3.0 | Treat as zero by MCPB.py |
| DIHE | n –c –Y2–M1 | IDIVF = 3; k = 0.0; γ = 0°; n = 3.0 | Treat as zero by MCPB.py |
| IMPR | X –X –c –Y2 | k = 10.5; γ = 180°; n = 2 | JCC, 7, (1986),230 |
| IMPR | Y1–Y2–c –n | k = 10.5; γ = 180°; n = 2 | Using general improper torsional angle X– X– c– o, penalty score = 6.0 |
| IMPR | Y1–cd–cd–nh | k = 1.1; γ = 180°; n = 2 | Using the default value |
| NONB | M1 | Rmin/2 = 1.37 Å; ε = 0.01 | IOD set for Zn2+ ion for the OPC water model from Li et al. JCTC, 2020, 16, 4429 |
| NONB | Y1 | Rmin/2 = 1.82 Å; ε = 0.17 | OPLS |
| NONB | Y2 | Rmin/2 = 1.66 Å; ε = 0.21 | OPLS |

**Table S9a.** Force Field parameters obtained for LF1 in the KR–LF1 complex using DFT (B3LYP/6-31G(d)/SDD).

| **Type** | **Interaction** | **Parameters** | **Notes** |
| --- | --- | --- | --- |
| MASS | M1 | Mass = 65.4 amu | Zn ion |
| MASS | Y1 | Mass = 14.01 Charge = 0.530 | Sp2 N in non–pure aromatic systems |
| MASS | Y2 | Mass = 16.00 amu; Charge = 0.434 | O with one connected atom |
| BOND | Y1–M1 | k = 48.1 kcal·mol–1 ·Å2; r0 = 2.09 Å | Seminario |
| BOND | Y2–M1 | k = 61.9 kcal·mol–1 ·Å2; r0 = 2.01 Å | Seminario |
| BOND | Y1–c | k = 416.9 kcal·mol–1 ·Å2; r0 = 1.39 Å | CORR_SOURCE5 |
| BOND | Y1–cd | k = 525.4 kcal·mol–1 ·Å2; r0 = 1.32 Å | SOURCE3_SOURCE5 |
| BOND | c–Y2 | k = 637.7 kcal·mol–1 ·Å2; r0 = 1.22 Å | SOURCE1_SOURCE5 |
| ANGL | M1–Y1–c | k = 103.50; θ0 = 82.28° | Seminario |
| ANGL | M1–Y1–cd | k = 113.68; θ0 = 148.96° | Seminario |
| ANGL | Y1–M1–Y2 | k = 83.45; θ0 = 66.12° | Seminario |
| ANGL | c –Y2–M1 | k = 87.36; θ0 = 87.81° | Seminario |
| ANGL | Y1–c –Y2 | k = 73.9; θ0 = 123.18° | CORR_SOURCE5 |
| ANGL | Y1–cd–cd | k = 71.6; θ0 = 112.56° | SOURCE3 |
| ANGL | Y1–cd–nh | k = 72.4; θ0 = 120.65° | SOURCE3_SOURCE5 |
| ANGL | cd–Y1–c | k = 66.7; θ0 = 120.49° | CORR_SOURCE5 |
| ANGL | n –c –Y1 | k = 71.6; θ0 = 117.11° | CORR_SOURCE5 |
| ANGL | n –c –Y2 | k = 74.2; θ0 = 123.05° | SOURCE3_SOURCE5 |
| DIHE | X –c –Y1–X | IDIVF = 2; k = 8.0; γ = 180°; n = 2.0 | same as X–C–NC–X |
| DIHE | X –cd–Y1–X | IDIVF = 2; k = 9.5; γ = 180°; n = 2.0 | statistiv value from parm94 |
| DIHE | M1–Y1–c –Y2 | IDIVF = 3; k = 0.0; γ = 0°; n = 3.0 | Treat as zero by MCPB.py |
| DIHE | M1–Y1–cd–cd | IDIVF = 3; k = 0.0; γ = 0°; n = 3.0 | Treat as zero by MCPB.py |
| DIHE | M1–Y1–cd–nh | IDIVF = 3; k = 0.0; γ = 0°; n = 3.0 | Treat as zero by MCPB.py |
| DIHE | Y1–M1–Y2–c | IDIVF = 3; k = 0.0; γ = 0°; n = 3.0 | Treat as zero by MCPB.py |
| DIHE | Y1–c –Y2–M1 | IDIVF = 3; k = 0.0; γ = 0°; n = 3.0 | Treat as zero by MCPB.py |
| DIHE | Y2–M1–Y1–c | IDIVF = 3; k = 0.0; γ = 0°; n = 3.0 | Treat as zero by MCPB.py |
| DIHE | Y2–M1–Y1–cd | IDIVF = 3; k = 0.0; γ = 0°; n = 3.0 | Treat as zero by MCPB.py |
| DIHE | cd–Y1–c –Y2 | IDIVF = 3; k = 0.0; γ = 0°; n = 3.0 | Treat as zero by MCPB.py |
| DIHE | n –c –Y1–M1 | IDIVF = 3; k = 0.0; γ = 0°; n = 3.0 | Treat as zero by MCPB.py |
| DIHE | n –c –Y2–M1 | IDIVF = 3; k = 0.0; γ = 0°; n = 3.0 | Treat as zero by MCPB.py |
| IMPR | X –X –c –Y2 | k = 10.5; γ = 180°; n = 2 | JCC, 7, (1986),230 |
| IMPR | Y1–Y2–c –n | k = 10.5; γ = 180°; n = 2 | Using general improper torsional angle X– X– c– o, penalty score = 6.0 |
| IMPR | Y1–cd–cd–nh | k = 1.1; γ = 180°; n = 2 | Using the default value |
| NONB | M1 | Rmin/2 = 1.37 Å; ε = 0.01 | IOD set for Zn2+ ion for the OPC water model from Li et al. JCTC, 2020, 16, 4429 |
| NONB | Y1 | Rmin/2 = 1.82 Å; ε = 0.17 | OPLS |
| NONB | Y2 | Rmin/2 = 1.66 Å; ε = 0.21 | OPLS |

**Table S9b.** Force Field parameters obtained for LF2 in the KR–LF2 complex using DFT (B3LYP/6-31G(d)/SDD).

**Table S9c.** Force Field parameters obtained for LG1 in the KR–LG1 complex using DFT (B3LYP/6-31G(d)/SDD).

| **Type** | **Interaction** | **Parameters** | **Notes** |
| --- | --- | --- | --- |
| MASS | M1 | Mass = 65.4 amu | Zn ion |
| MASS | Y1 | Mass = 16.00 amu; Charge = 0.434 | O with one connected atom |
| BOND | Y1–M1 | k = 74.6 kcal·mol–1 ·Å2; r0 = 1.92 Å | Seminario |
| BOND | c–Y1 | k = 637.7; r0 = 1.22 Å | SOURCE1_SOURCE5 |
| ANGL | c–Y1–M1 | k = 37.88; θ0 = 125.55° | Seminario |
| ANGL | Y1–c–cc | k = 69.1; θ0 = 123.93° | SOURCE3_SOURCE5 |
| ANGL | n–c–Y1 | k = 74.2; θ0 = 123.05° | SOURCE3_SOURCE5 |
| DIHE | M1–Y1–c–cc | IDIVF = 3; k = 0.0; γ = 0°; n = 3.0 | Treat as zero by MCPB.py |
| DIHE | hn–n–c–Y1 | IDIVF = 1; k = 2.5; γ = 180°; n = –2.0 | JCC, 7, (1986), 230 |
| DIHE | hn–n–c–Y1 | IDIVF = 1; k = 2.0; γ = 0°; n = 1.0 | J.C. cistrans–NMA DE |
| DIHE | n–c–Y1–M1 | IDIVF = 3; k = 0.0; γ = 0°; n = 3.0 | Treat as zero by MCPB.py |
| IMPR | X–X–c–Y1 | k = 10.5; γ = 180°; n = 2 | JCC, 7, (1986), 230 |
| IMPR | Y1–cc–c–n | k = 10.5; γ = 180°; n = 2 | Using general improper torsional angle X– X– c– o, penalty score = 6.0) |
| NONB | M1 | Rmin/2 = 1.37 Å; ε = 0.01 | IOD set for Zn2+ ion for the OPC water model from Li et al. JCTC, 2020, 16, 4429 |
| NONB | Y1 | Rmin/2 = 1.66 Å; ε = 0.21 | OPLS |

**Table S9d.** Force Field parameters obtained for LG2 in the KR–LG2 complex using DFT (B3LYP/6-31G(d)/SDD).

| **Type** | **Interaction** | **Parameters** | **Notes** |
| --- | --- | --- | --- |
| MASS | M1 | Mass = 65.4 amu | Zn ion |
| MASS | Y1 | Mass = 16.00 amu; Charge = 0.434 | O with one connected atom |
| BOND | Y1–M1 | k = 81.3 kcal·mol–1 ·Å2; r0 = 1.92 Å | Seminario |
| BOND | c–Y1 | k = 637.7; r0 = 1.22 Å | SOURCE1_SOURCE5 |
| ANGL | c–Y1–M1 | k = 43.72; θ0 = 123.18° | Seminario |
| ANGL | Y1–c–cc | k = 69.1; θ0 = 123.93° | SOURCE3_SOURCE5 |
| ANGL | n–c–Y1 | k = 74.2; θ0 = 123.05° | SOURCE3_SOURCE5 |
| DIHE | M1–Y1–c–cc | IDIVF = 3; k = 0.0; γ = 0°; n = 3.0 | Treat as zero by MCPB.py |
| DIHE | hn–n–c–Y1 | IDIVF = 1; k = 2.5; γ = 180°; n = –2.0 | JCC, 7, (1986), 230 |
| DIHE | hn–n–c–Y1 | IDIVF = 1; k = 2.0; γ = 0°; n = 1.0 | J.C. cistrans–NMA DE |
| DIHE | n–c–Y1–M1 | IDIVF = 3; k = 0.0; γ = 0°; n = 3.0 | Treat as zero by MCPB.py |
| IMPR | X–X–c–Y1 | k = 10.5; γ = 180°; n = 2 | JCC, 7, (1986), 230 |
| IMPR | Y1–cc–c–n | k = 10.5; γ = 180°; n = 2 | Using general improper torsional angle X– X– c– o, penalty score = 6.0) |
| NONB | M1 | Rmin/2 = 1.37 Å; ε = 0.01 | IOD set for Zn2+ ion for the OPC water model from Li et al. JCTC, 2020, 16, 4429 |
| NONB | Y1 | Rmin/2 = 1.66 Å; ε = 0.21 | OPLS |

**Table S9e.** Force Field parameters obtained for LH1 in the KR–LH1 complex using DFT (B3LYP/6-31G(d)/SDD).

| **Type** | **Interaction** | **Parameters** | **Notes** |
| --- | --- | --- | --- |
| MASS | M1 | Mass = 65.4 amu | Zn ion |
| MASS | Y1 | Mass = 16.00 amu; Charge = 0.434 | O with one connected atom |
| BOND | Y1–M1 | k = 74.3 kcal·mol–1 ·Å2; r0 = 1.91 Å | Seminario |
| BOND | c–Y1 | k = 637.7; r0 = 1.22 Å | SOURCE1_SOURCE5 |
| ANGL | c–Y1–M1 | k = 37.97; θ0 = 137.68° | Seminario |
| ANGL | Y1–c–cc | k = 69.1; θ0 = 123.93° | SOURCE3_SOURCE5 |
| ANGL | n–c–Y1 | k = 74.2; θ0 = 123.05° | SOURCE3_SOURCE5 |
| DIHE | M1–Y1–c–cc | IDIVF = 3; k = 0.0; γ = 0°; n = 3.0 | Treat as zero by MCPB.py |
| DIHE | hn–n–c–Y1 | IDIVF = 1; k = 2.5; γ = 180°; n = –2.0 | JCC, 7, (1986), 230 |
| DIHE | hn–n–c–Y1 | IDIVF = 1; k = 2.0; γ = 0°; n = 1.0 | J.C. cistrans–NMA DE |
| DIHE | n–c–Y1–M1 | IDIVF = 3; k = 0.0; γ = 0°; n = 3.0 | Treat as zero by MCPB.py |
| IMPR | X–X–c–Y1 | k = 10.5; γ = 180°; n = 2 | JCC, 7, (1986), 230 |
| IMPR | Y1–cc–c–n | k = 10.5; γ = 180°; n = 2 | Using general improper torsional angle X– X– c– o, penalty score = 6.0) |
| NONB | M1 | Rmin/2 = 1.37 Å; ε = 0.01 | IOD set for Zn2+ ion for the OPC water model from Li et al. JCTC, 2020, 16, 4429 |
| NONB | Y1 | Rmin/2 = 1.66 Å; ε = 0.21 | OPLS |

**Table S9f.** Force Field parameters obtained for LH2 in the KR–LH2 complex using DFT (B3LYP/6-31G(d)/SDD).

| **Type** | **Interaction** | **Parameters** | **Notes** |
| --- | --- | --- | --- |
| MASS | M1 | Mass = 65.4 amu | Zn ion |
| MASS | Y1 | Mass = 16.00 amu; Charge = 0.434 | O with one connected atom |
| BOND | Y1–M1 | k = 73.7 kcal·mol–1 ·Å2; r0 = 1.91 Å | Seminario |
| BOND | c–Y1 | k = 637.7; r0 = 1.22 Å | SOURCE1_SOURCE5 |
| ANGL | c–Y1–M1 | k = 38.27; θ0 = 137.73° | Seminario |
| ANGL | cd–c–Y1 | k = 69.1; θ0 = 123.93° | SOURCE3_SOURCE5 |
| ANGL | n–c–Y1 | k = 74.2; θ0 = 123.05° | SOURCE3_SOURCE5 |
| DIHE | cd–c–Y1–M1 | IDIVF = 3; k = 0.0; γ = 0°; n = 3.0 | Treat as zero by MCPB.py |
| DIHE | hn–n–c–Y1 | IDIVF = 1; k = 2.5; γ = 180°; n = –2.0 | JCC, 7, (1986), 230 |
| DIHE | hn–n–c–Y1 | IDIVF = 1; k = 2.0; γ = 0°; n = 1.0 | J.C. cistrans–NMA DE |
| DIHE | n–c–Y1–M1 | IDIVF = 3; k = 0.0; γ = 0°; n = 3.0 | Treat as zero by MCPB.py |
| IMPR | X–X–c–Y1 | k = 10.5; γ = 180°; n = 2 | JCC, 7, (1986), 230 |
| IMPR | Y1–cd–c–n | k = 10.5; γ = 180°; n = 2 | Using general improper torsional angle X– X– c– o, penalty score = 6.0) |
| NONB | M1 | Rmin/2 = 1.37 Å; ε = 0.01 | IOD set for Zn2+ ion for the OPC water model from Li et al. JCTC, 2020, 16, 4429 |
| NONB | Y1 | Rmin/2 = 1.66 Å; ε = 0.21 | OPLS |
